# Supplementary material for: Cadmium-free quantum dots as time-gated bioimaging probes in highly-autofluorescent human breast cancer cells
Source: Royal Society of Chemistry journal article supplement (doi:10.1039/c2cc37529j), 2012-11-14
Supplement: c2cc37529j.pdf [file c2cc37529j.pdf]

Electronic Supplementary Information (ESI) for

## Cadmium-Free Quantum Dots as Time-Gated Bioimaging Probes in Highly-Autofluorescent Human Breast Cancer Cells

Gopa Mandal,<sup>a</sup> Molly Darragh,<sup>b</sup> Y Andrew Wang<sup>b</sup> and Colin D. Heyes<sup>a\*</sup>

<sup>a</sup> Department of Chemistry and Biochemistry, University of Arkansas, 345 N. Campus Drive, Fayetteville, AR, 72701, U.S.A. Fax: 479-575-4049; Tel: 479-575-5607; E-mail: cheyes@uark.edu

<sup>b</sup> Ocean NanoTech, 2143 Worth Lane, Springdale, AR, 72764.

### Experimental Details and Spectra of CIS/ZnS and CdSe/ZnS QDs

To render the QDs water soluble, the surfaces are coated with amphiphilic poly(maleic anhydride-alt-1-octadecene) via hydrophobic interactions, as previously described.<sup>1</sup> This polymer has multiple carboxylic acid groups to solubilize the QDs in aqueous solution and allows them to be coupled to lysine residues using 1-Ethyl-3-[3-dimethylaminopropyl]carbodiimide (EDC) as a crosslinker. After purification of the QD-bioconjugates by ultracentrifugation, QDs were resuspended in borate buffer. Fig. S1 shows the UV-visible and luminescence spectra of the CIS/ZnS and CdSe/ZnS QDs. The maximum emission wavelength of CdSe/ZnS and CIS/ZnS was 622 nm and 628 nm, respectively, and show spectral line widths of ~24 nm and ~107 nm. The quantum yields were found to be 60% and 30%, respectively. Although CIS/ZnS have a lower QY and wider spectral line widths we show in the manuscript that they perform just as well as the higher QY and narrower-emitting CdSe/ZnS QD for time gated imaging (TGI).

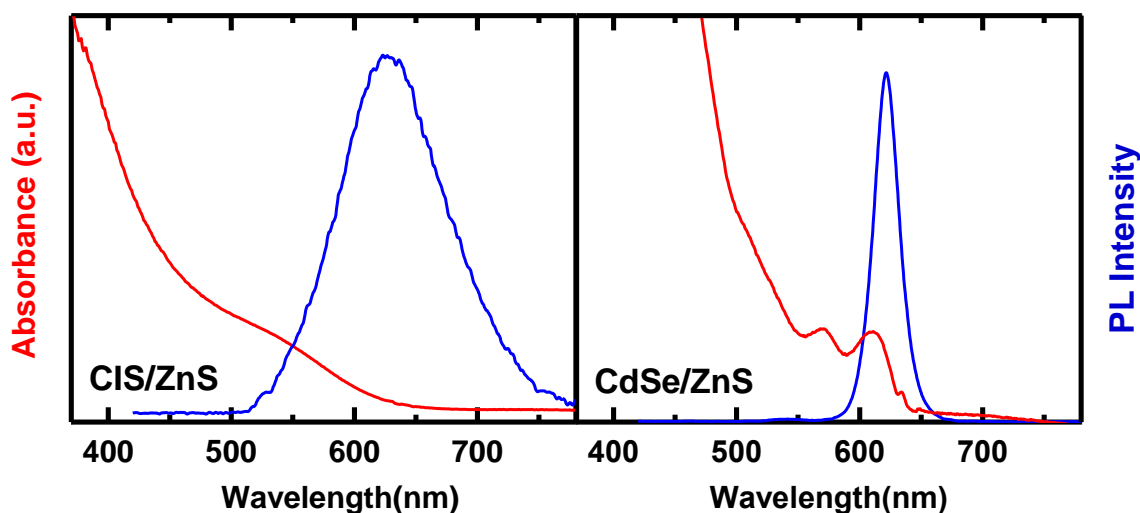

Figure S 1 - Absorption and photoluminescence spectra of CIS/ZnS and CdSe/ZnS QDs

### References

- 1 K. Chen, J. Xie, H. Xu, D. Behera, M. H. Michalski, S. Biswal, A. Wang and X. Chen, *Biomaterials*, 2009, **30**, 6912.
